# Supplementary material
Source: PubMed Central journal article supplement (PMC4551075)

**Supplemental Table:** Microbiology of initial CLABSI for patients without and with specific GI conditions.

| Organism Type    | Organism                           | Pathogen Mix of Specific GI Conditions* |                               |                                          |                                | No MBI-GI Condition<br>(n = 211) |
|------------------|------------------------------------|-----------------------------------------|-------------------------------|------------------------------------------|--------------------------------|----------------------------------|
|                  |                                    | Bowel Resection<br>(n = 63)             | Past Surgical NEC<br>(n = 28) | Gastroschisis or Omphalocele<br>(n = 31) | Intestinal Atresia<br>(n = 20) |                                  |
| MBI Organism     | Enterobacteriaceae                 | 12 (19)                                 | 2 (7)                         | 7 (23)                                   | 5 (25)                         | 46 (22)                          |
|                  | Enterococcus                       | 12 (19)                                 | 6 (21)                        | 3 (10)                                   | 2 (10)                         | 23 (11)                          |
|                  | Yeast                              | 6 (10)                                  | 5 (18)                        | 1 (3)                                    | 1 (5)                          | 8 (4)                            |
|                  | Polymicrobial with MBI organism    | 1 (2)                                   | 0                             | 2 (6.5)                                  | 2 (10)                         | 11 (5)                           |
|                  | <b>TOTAL</b>                       | <b>31 (49)</b>                          | <b>13 (46)</b>                | <b>13 (42)</b>                           | <b>10 (50)</b>                 | <b>67 (32)</b>                   |
| Non-MBI Organism | Common Commensal                   | 22 (35)                                 | 11 (39)                       | 11 (35)                                  | 6 (30)                         | 67 (32)                          |
|                  | Staph aureus                       | 4 (6)                                   | 2 (7)                         | 5 (16)                                   | 4 (20)                         | 54 (26)                          |
|                  | Other Gram Negative                | 2 (3)                                   | 0                             | 0                                        | 0                              | 10 (5)                           |
|                  | Other Gram Positive                | 0                                       | 0                             | 2 (6.5)                                  | 0                              | 0                                |
|                  | Polymicrobial with no MBI organism | 4 (6)                                   | 2 (7)                         | 0                                        | 0                              | 11 (6)                           |
|                  | <b>TOTAL</b>                       | <b>32 (51)</b>                          | <b>15 (54)</b>                | <b>18 (58)</b>                           | <b>10 (50)</b>                 | <b>144 (68)</b>                  |

\*Organisms isolated in patients with specific GI diagnoses; patients with multiple GI conditions appear in more than one column

**Supplemental Figure:** Proportion of MBI-GI and non-MBI-GI CLABSI by site

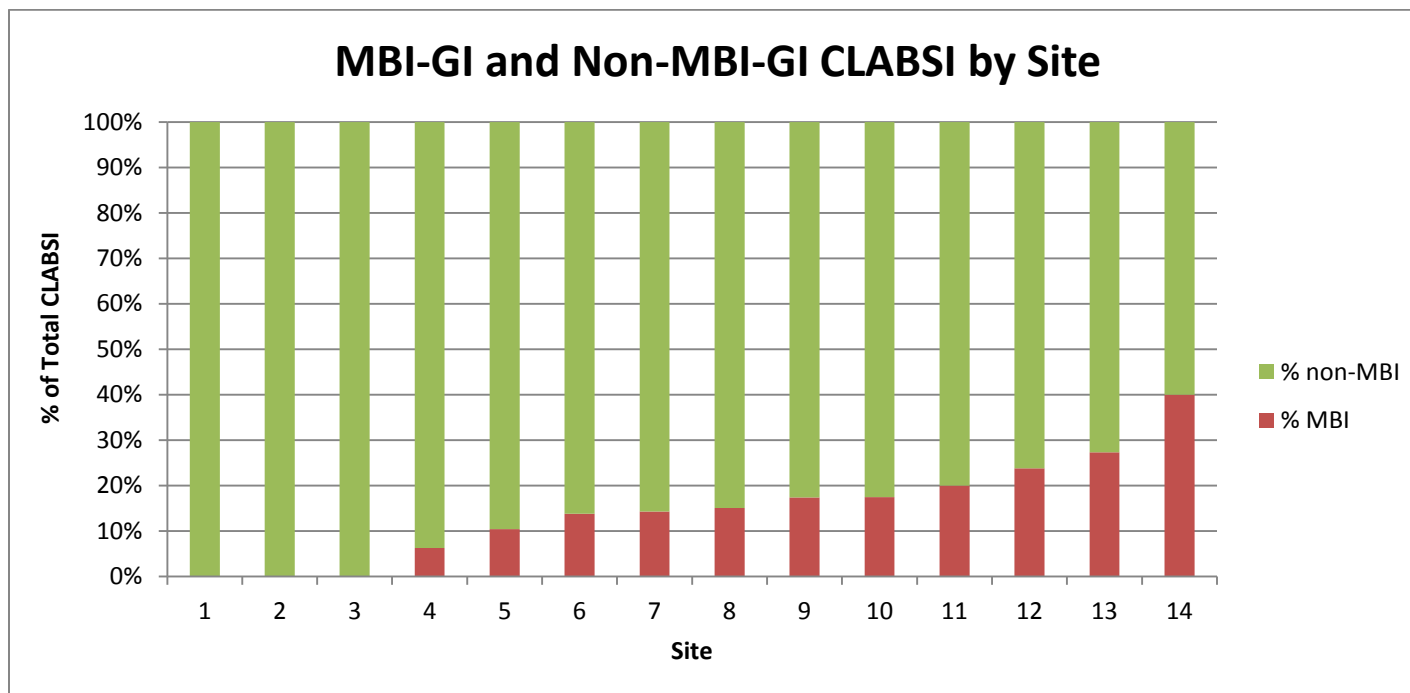

Supplement: NIHMS716377-supplement-supplement_1.pdf [file NIHMS716377-supplement-supplement_1.pdf]
